# Supplementary material for: Longitudinal Study of Antibiotic Resistance of Staphylococci from Cases of Subclinical Mastitis in Sheep in Greece: Incidence and Risk Factors
Source: MDPI journal article supplement (doi:10.3390/antibiotics12121703), 2023-12-07
Supplement: s1 [file s1]

# Longitudinal Study of Antibiotic Resistance of Staphylococci from Cases of Subclinical Mastitis in Sheep in Greece: Incidence and Risk Factors

Charalambia K. Michael, Daphne T. Lianou, Katerina Tsilipounidaki, Zoe Florou, Natalia G.C. Vasileiou, Vasia S. Mavrogianni, Efthymia Petinaki and George C. Fthenakis

**Table S1.** Frequency of resistant isolates among different staphylococcal species recovered from cases of subclinical mastitis during this longitudinal study throughout a milking period in 12 sheep flocks in Greece.

| Staphylococcal Species                  | Resistant Isolates      | Multidrug-Resistant Isolates |
|-----------------------------------------|-------------------------|------------------------------|
| <i>S. aureus</i> (n = 38 <sup>1</sup> ) | 7 (18.4% <sup>2</sup> ) | 0 (0.0% <sup>2</sup> )       |
| <i>S. capitis</i> (n = 2)               | 1 (50.0%)               | 0 (0.0%)                     |
| <i>S. caprae</i> (n = 6)                | 1 (16.7%)               | 1 (16.7%)                    |
| <i>S. chromogenes</i> (n = 24)          | 8 (33.3%)               | 4 (16.7%)                    |
| <i>S. epidermidis</i> (n = 28)          | 8 (28.6%)               | 3 (10.7%)                    |
| <i>S. equorum</i> (n = 4)               | 3 (75.0%)               | 2 (50.0%)                    |
| <i>S. haemolyticus</i> (n = 4)          | 3 (75.0%)               | 1 (25.0%)                    |
| <i>S. hominis</i> (n = 5)               | 4 (80.0%)               | 2 (40.0%)                    |
| <i>S. lentus</i> (n = 9)                | 5 (55.6%)               | 1 (11.1%)                    |
| <i>S. saprophyticus</i> (n = 1)         | 1 (100.0%)              | 1 (100.0%)                   |
| <i>S. schleiferi</i> (n = 1)            | 0 (0.0%)                | 0 (0.0%)                     |
| <i>S. sciuri</i> (n = 3)                | 1 (33.3%)               | 1 (33.3%)                    |
| <i>S. simulans</i> (n = 34)             | 9 (26.5%)               | 4 (11.8%)                    |
| <i>S. warneri</i> (n = 2)               | 2 (100.0%)              | 0 (0.0%)                     |
| <i>S. xylosum</i> (n = 18)              | 4 (22.2%)               | 1 (5.6%)                     |
| All staphylococcal species (n = 179)    | 57 (31.8%)              | 21 (11.7%)                   |

<sup>1</sup> total no. of isolates recovered and tested; <sup>2</sup> proportion of isolates resistant to at least one (any) antibiotic or of multidrug-resistant isolates among all isolates of that species.

**Table S2.** Frequency of susceptibility / resistance to individual antibiotics of staphylococcal isolates recovered from cases of subclinical mastitis during this longitudinal study throughout a milking period in 12 sheep flocks in Greece.

|                         | <i>n</i> <sup>1</sup> | AMI <sup>2</sup> | AMP | CIP | CLI | ERY | FOS | FUS | GEN | MOX | MUP | OXA | PEN | RIF | TEI | TET | TOB | SXT | VAN |
|-------------------------|-----------------------|------------------|-----|-----|-----|-----|-----|-----|-----|-----|-----|-----|-----|-----|-----|-----|-----|-----|-----|
| <i>S. aureus</i>        | 7                     |                  | 4   |     | 1   | 1   |     |     |     |     |     | 2   | 4   |     |     | 2   |     |     |     |
| <i>S. capitis</i>       | 1                     |                  |     |     |     |     | 1   |     |     |     |     |     |     |     |     | 1   |     |     |     |
| <i>S. caprae</i>        | 1                     |                  | 1   |     | 1   |     |     |     |     |     |     |     | 1   |     |     | 1   |     |     |     |
| <i>S. chromogenes</i>   | 8                     |                  | 6   |     | 1   | 3   | 1   |     | 1   |     |     | 2   | 6   |     |     | 5   | 1   |     |     |
| <i>S. epidermidis</i>   | 8                     |                  | 5   |     | 3   | 3   | 2   |     | 1   |     |     | 2   | 5   |     |     | 5   |     |     |     |
| <i>S. equorum</i>       | 3                     |                  | 3   |     | 2   | 2   | 1   |     |     |     |     | 1   | 3   |     |     |     |     |     |     |
| <i>S. haemolyticus</i>  | 3                     |                  | 1   |     | 2   | 1   | 1   |     |     |     |     | 1   | 1   |     |     | 1   |     |     |     |
| <i>S. hominis</i>       | 4                     |                  | 3   |     | 1   | 1   | 2   |     |     |     |     | 2   | 3   |     |     | 1   |     |     |     |
| <i>S. lentus</i>        | 5                     |                  | 3   |     | 2   | 2   | 1   |     | 1   |     |     |     | 3   |     |     | 2   |     |     |     |
| <i>S. saprophyticus</i> | 1                     |                  | 1   |     |     |     |     |     |     |     |     | 1   | 1   |     |     | 1   |     |     |     |
| <i>S. schleiferi</i>    | 0                     |                  |     |     |     |     |     |     |     |     |     |     |     |     |     |     |     |     |     |
| <i>S. sciuri</i>        | 1                     |                  | 1   | 1   | 1   |     |     |     |     | 1   |     |     | 1   |     |     |     |     |     |     |
| <i>S. simulans</i>      | 9                     |                  | 6   |     | 3   | 4   |     |     |     |     |     | 1   | 6   |     |     | 6   |     |     |     |
| <i>S. warneri</i>       | 2                     |                  |     |     | 1   | 1   |     |     |     |     |     |     |     |     |     | 1   |     |     |     |
| <i>S. xylosum</i>       | 4                     |                  | 2   |     | 2   | 2   | 2   |     | 1   |     |     |     | 2   |     |     | 1   |     |     |     |
| Total                   | 57                    | 0                | 36  | 1   | 20  | 20  | 11  | 0   | 4   | 1   | 0   | 12  | 36  | 0   | 0   | 27  | 1   | 0   | 0   |

<sup>1</sup> Total no. of isolates found with resistance to at least one (any) antibiotic).

<sup>2</sup> AMI: amikacin, AMP: ampicillin, CIP: ciprofloxacin, CLI: clindamycin, ERY: erythromycin, FOS: fosfomycin, FUS: fusidic acid, GEN: gentamicin, MOX: moxifloxacin, MUP: mupirocin, OXA: oxacillin, PEN: penicillin, RIF: rifampicin, TEI: teicoplanin, TET: tetracycline, TOB: tobramycin, SXT: trimethoprim-sulfamethoxazole, VAN; vancomycin.

**Table S3.** Incidence risk of isolation of antibiotic-resistant staphylococci from cases of subclinical mastitis among 12 sheep flocks in Greece monitored throughout a milking period.

| <b>Farm</b> | <b>Incidence risk of isolation of oxacillin-resistant staphylococci</b> | <b>Incidence risk of isolation of staphylococci resistant to at least one (any) antibiotic</b> | <b>Incidence risk of isolation of multidrug-resistant staphylococci</b> |
|-------------|-------------------------------------------------------------------------|------------------------------------------------------------------------------------------------|-------------------------------------------------------------------------|
| 1           | 0.0%                                                                    | 25.0%                                                                                          | 20.0%                                                                   |
| 2           | 5.0%                                                                    | 20.0%                                                                                          | 5.0%                                                                    |
| 3           | 5.0%                                                                    | 25.0%                                                                                          | 5.0%                                                                    |
| 4           | 5.0%                                                                    | 10.0%                                                                                          | 5.0%                                                                    |
| 5           | 5.0%                                                                    | 20.0%                                                                                          | 10.0%                                                                   |
| 6           | 10.0%                                                                   | 30.0%                                                                                          | 10.0%                                                                   |
| 7           | 10.0%                                                                   | 35.0%                                                                                          | 10.0%                                                                   |
| 8           | 0.0%                                                                    | 10.0%                                                                                          | 5.0%                                                                    |
| 9           | 10.0%                                                                   | 45.0%                                                                                          | 20.0%                                                                   |
| 10          | 0.0%                                                                    | 20.0%                                                                                          | 5.0%                                                                    |
| 11          | 0.0%                                                                    | 15.0%                                                                                          | 10.0%                                                                   |
| 12          | 10.0%                                                                   | 30.0%                                                                                          | 0.0%                                                                    |

**Table S4.** Results (Spearman's rank correlation coefficients) of univariable analysis of variables ( $n = 20$ ) evaluated for association with the outcomes of 'isolation of staphylococci from cases of subclinical mastitis, resistant to at least one (any) antibiotic', 'isolation of oxacillin-resistant staphylococci from cases of subclinical mastitis' and 'isolation of multidrug-resistant staphylococci from cases of subclinical mastitis' recovered from cases of subclinical mastitis during this longitudinal study throughout a milking period in 12 sheep flocks in Greece.

| Variables                                                                            | Isolation of staphylococci from cases of subclinical mastitis, resistant to at least one (any) antibiotic |            | Isolation of oxacillin-resistant staphylococci from cases of sub-clinical mastitis |            | Isolation of multidrug-resistant staphylococci from cases of subclinical mastitis |            |
|--------------------------------------------------------------------------------------|-----------------------------------------------------------------------------------------------------------|------------|------------------------------------------------------------------------------------|------------|-----------------------------------------------------------------------------------|------------|
|                                                                                      | Correlation coefficient ( $r_{sp}$ )                                                                      | $p$ -value | Correlation coefficient ( $r_{sp}$ )                                               | $p$ -value | Correlation coefficient ( $r_{sp}$ )                                              | $p$ -value |
| Management system applied in the flocks                                              | 0.002                                                                                                     | 0.99       | -0.317                                                                             | 0.32       | -0.094                                                                            | 0.77       |
| No. of ewes in the flock                                                             | 0.321                                                                                                     | 0.31       | 0.385                                                                              | 0.22       | 0.351                                                                             | 0.26       |
| Average age of culling females                                                       | -0.383                                                                                                    | 0.22       | 0.124                                                                              | 0.70       | -0.365                                                                            | 0.24       |
| Month of the start of the lambing season                                             | -0.026                                                                                                    | 0.94       | 0.311                                                                              | 0.32       | -0.421                                                                            | 0.17       |
| Total visits made annually by veterinarians to the flock during the preceding season | 0.002                                                                                                     | 0.99       | -0.195                                                                             | 0.54       | 0.079                                                                             | 0.81       |
| Use of laboratory diagnostic examinations in samples of milk preventively            | -0.124                                                                                                    | 0.70       | -0.207                                                                             | 0.52       | 0.052                                                                             | 0.87       |
| Age of lamb removal from their dams                                                  | -0.487                                                                                                    | 0.11       | -0.376                                                                             | 0.23       | -0.549                                                                            | 0.06       |
| Daily number of milking sessions                                                     | 0.480                                                                                                     | 0.11       | 0.236                                                                              | 0.46       | 0.266                                                                             | 0.40       |
| Duration of the dry-period                                                           | -0.228                                                                                                    | 0.48       | 0.094                                                                              | 0.77       | -0.085                                                                            | 0.79       |
| Administration of selenium to pregnant ewes                                          | 0.394                                                                                                     | 0.21       | 0.548                                                                              | 0.07       | -0.240                                                                            | 0.45       |
| Administration of 'dry-ewe' treatment at the end of the lactation period             | -0.073                                                                                                    | 0.82       | 0.2041                                                                             | 0.52       | -0.460                                                                            | 0.13       |
| Use of teat disinfection after milking                                               | -0.033                                                                                                    | 0.92       | 0.195                                                                              | 0.54       | -0.172                                                                            | 0.59       |
| Number of antibiotics used for treatment of mastitis                                 | 0.022                                                                                                     | 0.95       | -0.108                                                                             | 0.74       | 0.593                                                                             | 0.042      |
| Route for administration of antimicrobials                                           | -0.114                                                                                                    | 0.72       | -0.195                                                                             | 0.54       | 0.402                                                                             | 0.19       |
| Vaccination against staphylococcal mastitis                                          | 0.734                                                                                                     | 0.007      | 0.707                                                                              | 0.010      | 0.089                                                                             | 0.78       |

|                                                        |        |      |        |       |        |      |
|--------------------------------------------------------|--------|------|--------|-------|--------|------|
| Annual frequency of systemic disinfections in the farm | 0.125  | 0.70 | −0.276 | 0.38  | 0.317  | 0.31 |
| Temperature of cleaning water in the milking parlour   | 0.117  | 0.72 | 0.336  | 0.39  | 0.029  | 0.93 |
| Age of the farmer                                      | 0.156  | 0.63 | −0.119 | 0.71  | −0.267 | 0.40 |
| Length of animal farming experience of the farmer      | 0.088  | 0.79 | −0.168 | 0.60  | −0.339 | 0.28 |
| Level of education of the farmer                       | −0.404 | 0.19 | −0.625 | 0.030 | 0.047  | 0.88 |

**Figure S1.** Scatter-plot of incidence of isolation of multidrug-resistant staphylococci from cases of subclinical mastitis during this longitudinal study throughout a milking period in 12 sheep flocks in Greece and age of newborns when taken away from the dam (size of circles corresponds to the number of antibiotics used for the treatment of mastitis in the farm).

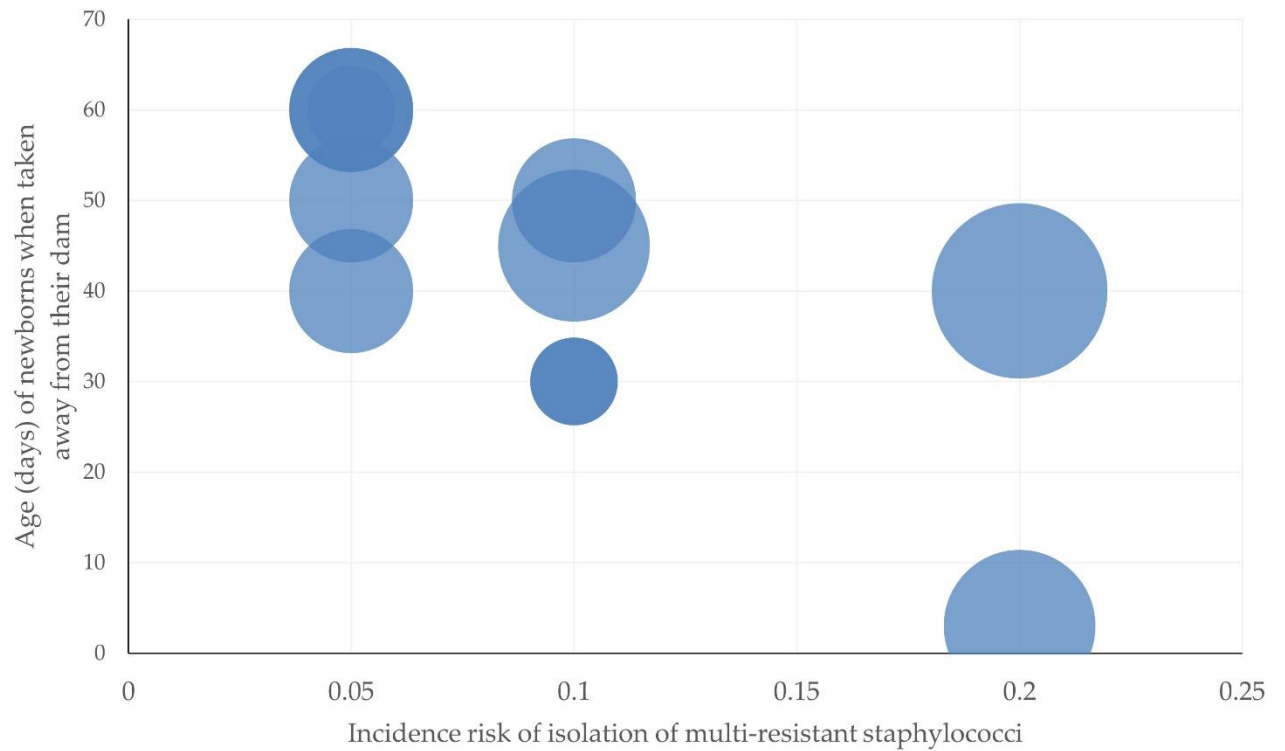

**Table S5.** Results of biofilm formation by staphylococcal isolates from cases of subclinical mastitis among 12 sheep flocks in Greece monitored throughout a milking period.

| Bacterial identity      | No. of bacterial isolates | No. (proportion) of biofilm-forming isolates |
|-------------------------|---------------------------|----------------------------------------------|
| <i>S. aureus</i>        | 38                        | 32 (84.2%)                                   |
| <i>S. capitis</i>       | 2                         | 1 (50.0%)                                    |
| <i>S. caprae</i>        | 6                         | 3 (50.0%)                                    |
| <i>S. chromogenes</i>   | 24                        | 18 (75.0%)                                   |
| <i>S. epidermidis</i>   | 28                        | 11 (39.3%)                                   |
| <i>S. equorum</i>       | 4                         | 2 (50.0%)                                    |
| <i>S. haemolyticus</i>  | 4                         | 2 (50.0%)                                    |
| <i>S. hominis</i>       | 5                         | 4 (80.0%)                                    |
| <i>S. lentus</i>        | 9                         | 3 (33.3%)                                    |
| <i>S. saprophyticus</i> | 1                         | 1 (100.0%)                                   |
| <i>S. schleiferi</i>    | 1                         | 0 (0.0%)                                     |
| <i>S. sciuri</i>        | 3                         | 1 (33.3%)                                    |
| <i>S. simulans</i>      | 34                        | 26 (76.5%)                                   |
| <i>S. warneri</i>       | 2                         | 1 (50.0%)                                    |
| <i>S. xylosus</i>       | 18                        | 12 (66.7%)                                   |
| Total                   | 179                       | 117 (65.4%)                                  |

**Table S6.** Contingency table indicating associations between anti-staphylococcal mastitis vaccination status and biofilm formation, according to antibiotic resistance, of staphylococcal isolates recovered from subclinical mastitis among 12 sheep flocks in Greece monitored throughout a milking period.

(a) Antibiotic-resistant isolates ( $n = 57$ )

|                                                    |   | Anti-staphylococcal mastitis vaccination |            |
|----------------------------------------------------|---|------------------------------------------|------------|
|                                                    |   | +                                        | -          |
| Biofilm formation<br>by staphylococcal<br>isolates | + | 15 (26.3%)                               | 19 (33.3%) |
|                                                    | - | 20 (35.1%)                               | 3 (5.3%)   |

(b) Non antibiotic-resistant isolates ( $n = 122$ )

|                                                    |   | Anti-staphylococcal mastitis vaccination |            |
|----------------------------------------------------|---|------------------------------------------|------------|
|                                                    |   | +                                        | -          |
| Biofilm formation<br>by staphylococcal<br>isolates | + | 49 (40.2%)                               | 34 (27.9%) |
|                                                    | - | 32 (26.2%)                               | 7 (5.7%)   |



**Table S7.** Details of 12 flocks included in this longitudinal study of subclinical mastitis in Greece.

| Farm | Location                  | Management system | No. of ewes | Breed of ewes | Start of lam-bing period | Annual milk pro-duction per ewe | Machine-milking | Milking sessions daily | Sampling period                         |
|------|---------------------------|-------------------|-------------|---------------|--------------------------|---------------------------------|-----------------|------------------------|-----------------------------------------|
| 1    | Achaea,<br>Western Greece | Semi-extensive    | 130         | Friesian      | September                | 154 L                           | Yes             | Two                    | 4 visits:<br>November 2019 to June 2020 |
| 2    | Achaea,<br>Western Greece | Semi-extensive    | 170         | Friesian      | October                  | 235 L                           | Yes             | Two                    | 4 visits:<br>December 2019 to June 2020 |
| 3    | Achaea,<br>Western Greece | Semi-extensive    | 180         | Local         | September                | 144 L                           | Yes             | Two                    | 4 visits:<br>November 2019 to June 2020 |
| 4    | Achaea,<br>Western Greece | Intensive         | 235         | Local         | October                  | 111 L                           | Yes             | Two                    | 4 visits:<br>December 2019 to June 2020 |
| 5    | Achaea,<br>Western Greece | Semi-intensive    | 150         | Lacaune       | September                | 167 L                           | Yes             | Two                    | 4 visits:<br>November 2019 to June 2020 |
| 6    | Achaea,<br>Western Greece | Semi-intensive    | 230         | Chios         | September                | 296 L                           | Yes             | Two                    | 4 visits:<br>November 2019 to June 2020 |
| 7    | Corinthia,<br>Peloponnese | Semi-intensive    | 300         | Local         | September                | 293 L                           | Yes             | Three                  | 4 visits:<br>November 2019 to June 2020 |
| 8    | Corinthia,<br>Peloponnese | Semi-intensive    | 85          | Assaf         | October                  | 400 L                           | Yes             | Two                    | 4 visits:<br>December 2019 to June 2020 |
| 9    | Corinthia,<br>Peloponnese | Intensive         | 600         | Chios         | October                  | 183 L                           | Yes             | Three                  | 4 visits:<br>December 2019 to June 2020 |
| 10   | Corinthia,<br>Peloponnese | Semi-intensive    | 230         | Assaf         | September                | 357 L                           | Yes             | Three                  | 4 visits:<br>November 2019 to June 2020 |
| 11   | Corinthia,<br>Peloponnese | Semi-intensive    | 280         | Lacaune       | September                | 232 L                           | Yes             | Two                    | 4 visits:<br>November 2019 to June 2020 |

|    |                           |                |     |       |         |       |     |     |                                         |
|----|---------------------------|----------------|-----|-------|---------|-------|-----|-----|-----------------------------------------|
| 12 | Corinthia,<br>Peloponnese | Semi-intensive | 145 | Local | October | 152 L | Yes | Two | 4 visits:<br>November 2019 to June 2020 |
|----|---------------------------|----------------|-----|-------|---------|-------|-----|-----|-----------------------------------------|

---

**Table S8.** Concentrations of antibiotics against which resistance of staphylococcal isolates was tested in the automated system BD Phoenix™ M50.

| <b>Antibiotics</b>            | <b>Antibiotic concentrations (mg L<sup>-1</sup>)</b> |
|-------------------------------|------------------------------------------------------|
| amikacin                      | 4, 8, 16                                             |
| ampicillin                    | 2, 4, 8                                              |
| ciprofloxacin                 | 0.25, 0.5, 1, 2, 4                                   |
| clindamycin                   | 0.25, 0.5, 1                                         |
| erythromycin                  | 0.25, 0.5, 1, 2                                      |
| fosfomicin                    | 16, 32, 64                                           |
| fucidic acid                  | 1, 2, 4, 8                                           |
| gentamicin                    | 1, 2, 4                                              |
| moxifloxacin                  | 0.25, 0.5, 1, 2                                      |
| mupirocin                     | 1, 2, 4                                              |
| oxacillin                     | 0.25, 0.5, 1, 2                                      |
| penicillin G                  | 0.0625, 0.125, 0.25                                  |
| rifampicin                    | 0.25, 0.5, 1                                         |
| teicoplanin                   | 1, 2, 4                                              |
| tetracycline                  | 0.5, 1, 2                                            |
| tobramycin                    | 1, 2, 4                                              |
| trimethoprim-sulfamethoxazole | 1, 2, 4                                              |
| vancomycin                    | 0.5, 1, 2                                            |

**Table S9.** Detailed description of the criteria for definition of subclinical mastitis in sheep flocks.

---

Subclinical mastitis was defined in ewes, in which:

- (1) a bacteriologically positive mammary secretion sample: [a] > 10 colonies of the same organism and [b] no more than two different types of colonies,
  - (2) with concurrently increased cell content: [a] CMT score  $\geq$  '1' and [b] neutrophil and lymphocyte proportion cumulatively  $\geq$  65% of all leucocytes, was detected,
  - (3) with no presence of abnormal gross findings in the mammary gland (including changes in secretion).
-

**Table S10.** Variables ( $n = 20$ ) evaluated for potential association with the isolation of antibiotic-resistant staphylococci from cases of subclinical mastitis during this longitudinal study throughout a milking period in 12 sheep flocks in Greece.

---

|                                                                           |
|---------------------------------------------------------------------------|
| Management system applied in the flocks                                   |
| No. of ewes in the flock                                                  |
| Average age of culling females                                            |
| Month of the start of the lambing season                                  |
| Total visits made annually by veterinarians to the flock                  |
| during the preceding season                                               |
| Use of laboratory diagnostic examinations in samples of milk preventively |
| Age of lamb removal from their dams                                       |
| Daily number of milking sessions                                          |
| Duration of the dry-period                                                |
| Administration of selenium to pregnant ewes                               |
| Administration of 'dry-ewe' treatment at the end of the lactation period  |
| Use of teat disinfection after milking                                    |
| Number of antibiotics used for treatment of mastitis                      |
| Route for administration of antimicrobials                                |
| Vaccination against staphylococcal mastitis                               |
| Annual frequency of systemic disinfections in the farm                    |
| Temperature of cleaning water in the milking parlour                      |
| Age of the farmer                                                         |
| Length of animal farming experience of the farmer                         |
| Level of education of the farmer                                          |

---

**Table S11.** Details of multivariable models employed for the evaluation of risk factors for the isolation of antibiotic-resistant staphylococci from cases of subclinical mastitis during this longitudinal study throughout a milking period in 12 sheep flocks in Greece.

| Outcome evaluated in each model of multivariable analysis                                                 | Number of variables offered to each multi-variable model | Variables used in the final round of backwards elimination during each model of multivariable analysis                                          |
|-----------------------------------------------------------------------------------------------------------|----------------------------------------------------------|-------------------------------------------------------------------------------------------------------------------------------------------------|
| Isolation of staphylococci from cases of subclinical mastitis, resistant to at least one (any) antibiotic | 4                                                        | (a) Vaccination against staphylococcal mastitis, (b) Level of education of the farmer                                                           |
| Isolation of oxacillin-resistant staphylococci from cases of subclinical mastitis                         | 2                                                        | (a) Administration of selenium to pregnant ewes, (b) Vaccination against staphylococcal mastitis                                                |
| Isolation of multidrug-resistant staphylococci from cases of subclinical mastitis                         | 5                                                        | (a) Month of the start of the lambing season, (b) Age of lamb removal from their dams, (c) Number of antibiotics used for treatment of mastitis |
